# Supplementary material
Source: PubMed Central journal article supplement (PMC7646789)
Supplement: tpmd200485.SD1.pdf [file tpmd200485.SD1.pdf]

Supplemental Table 1

Diagnostic performance of PfHRP2 and PfLDH RDT using microscopy as golden standard

| Test                   | Microscopy |     | Sensitivity<br>(95% CI) | Specificity<br>(95% CI) | PPV<br>(95% CI) | % NPV<br>(95% CI) | Kappa<br>(95% CI) |
|------------------------|------------|-----|-------------------------|-------------------------|-----------------|-------------------|-------------------|
|                        | Pos        | Neg |                         |                         |                 |                   |                   |
| <b>PfHRP<br/>2 RDT</b> | Pos        | 103 |                         |                         |                 |                   |                   |
|                        | Neg        | 4   | 96(91, 99)              | 93(90, 96)              | 84(76, 89)      | 99(96, 100)       | 0.86(0.80,91)     |
| <b>PfLDH<br/>RDT</b>   | Pos        | 95  |                         |                         |                 |                   |                   |
|                        | Neg        | 12  | 89 (81,93)              | 99(97, 100)             | 97 (91, 99)     | 96(93, 98)        | 0.90(.85.0.95)    |

**Note:** Pos=Positive, Neg=Negative, CI=Confidence interval, PPV=Positive Predictive value, NPV= Negative Predictive value
