# Supplementary material
Source: PubMed Central journal article supplement (PMC7646789)
Supplement: tpmd200485.SD2.pdf [file tpmd200485.SD2.pdf]

Supplemental Table 2

Performance of Microscopy, PfHRP2 RDT and PfLDH RDT using qPCR as golden standard for the diagnosis of *P. falciparum*

| Test          | qPCR |     | Sensitivity<br>(95% CI) | Specificity<br>(95% CI) | PPV<br>(95% CI) | NPV<br>(95% CI) | % Kappa<br>(95% CI)     |
|---------------|------|-----|-------------------------|-------------------------|-----------------|-----------------|-------------------------|
|               | Pos  | Neg |                         |                         |                 |                 |                         |
| Microscopy    | Pos  | 105 |                         |                         |                 |                 |                         |
|               | Neg  | 31  | 77(70,83)               | 99(96,99)               | 98(91,99)       | 90(85,92)       | 0.81(0.74,<br>0.87)     |
| PfHRP2<br>RDT | Pos  | 104 |                         |                         |                 |                 |                         |
|               | Neg  | 32  | 77(70, 83)              | 93(89, 95)              | 85(77, 89)      | 89(85, 92)      | 0.71(0.64,<br>0.79)     |
| PfLDH<br>RDT  | Pos  | 95  |                         |                         |                 |                 |                         |
|               | Neg  | 41  | 70 (62, 77)             | 98(96, 99)              | 97 (91,<br>99)  | 66(60, 70)      | 0.74<br>(0.67,<br>0.81) |

**NB:** Pos=Positive, Neg=Negative, CI=Confidence interval, PPV=Positive Predictive value, NPV=Negative Predictive value, qPCR=quantitative PCR
