# Supplementary material
Source: PubMed Central journal article supplement (PMC7646789)
Supplement: tpmd200485.SD3.pdf [file tpmd200485.SD3.pdf]

Supplemental Table 3

Sensitivity and Specificity of RDT by age using Microscopy as golden standard

| Age groups   |               | Microscopy |     | Sensitivity | Specificity | PPV          | NPV          |             |
|--------------|---------------|------------|-----|-------------|-------------|--------------|--------------|-------------|
|              |               | Pos        | Neg | (95% CI)    | (95% CI)    | (95% CI)     | (95% CI)     |             |
| 5-14years    | <b>PfHRP2</b> | Pos        | 23  | 5           | 96 (80, 99) | 92 (85, 97)  | 82(64, 92)   | 98(91, 100) |
|              |               | Neg        | 1   | 61          |             |              |              |             |
|              | <b>PfLDH</b>  | Pos        | 21  | 1           | 88(69, 96)  | 98(92, 100)  | 96(78,99)    | 96(88, 98)  |
|              |               | Neg        | 3   | 65          |             |              |              |             |
| 15-24years   | <b>PfHRP2</b> | Pos        | 45  | 5           | 98(89, 100) | 96(90, 98)   | 90(79, 96)   | 99(95, 100) |
|              |               | Neg        | 1   | 110         |             |              |              |             |
|              | <b>PfLDH</b>  | Pos        | 42  | 1           | 91(80, 97)  | (96, 100)    | 98(88, 99)   | 99(95, 99)  |
|              |               | Neg        | 4   | 114         |             |              |              |             |
| 25-34 years  | <b>PfHRP2</b> | Pos        | 21  | 6           | 95(78, 99)  | 92 (83, 96)  | 95(78, 99)   | 98(92, 99)  |
|              |               | Neg        | 1   | 65          |             |              |              |             |
|              | <b>PfLDH</b>  | Pos        | 20  | 1           | 91(72, 97)  | 99 (92, 100) | 90(72, 97)   | 97(90, 99)  |
|              |               | Neg        | 2   | 70          |             |              |              |             |
| >34<br>Years | <b>PfHRP2</b> | Pos        | 14  | 4           | 93(70, 98)  | 92(80, 97)   | 78(55, 91)   | 98(88, 99)  |
|              |               | Neg        | 1   | 43          |             |              |              |             |
|              | <b>PfLDH</b>  | Pos        | 12  | 0           | 80(55, 93)  | 100(92, 100) | 100(75, 100) | 94(84, 98)  |
|              |               | Neg        | 3   | 47          |             |              |              |             |
