# Supplementary material
Source: PubMed Central journal article supplement (PMC7646789)
Supplement: tpmd200485.SD4.pdf [file tpmd200485.SD4.pdf]

Supplemental Table 4  
Sensitivity and Specificity of RDT by age group using qPCR as golden standard

| Age groups  |               | Microscopy |     | Sensitivity<br>(95% CI) | Specificity<br>(95% CI) | PPV<br>(95% CI) | NPV<br>(95% CI) |              |
|-------------|---------------|------------|-----|-------------------------|-------------------------|-----------------|-----------------|--------------|
|             |               | Pos        | Neg |                         |                         |                 |                 |              |
| 5-14years   | <b>PfHRP2</b> | Pos        | 25  | 3                       | 96(81, 99)              | 95(87, 98)      | 89(73, 96)      | 98(91, 100)  |
|             |               | Neg        | 1   | 61                      |                         |                 |                 |              |
|             | <b>PfLDH</b>  | Pos        | 21  | 1                       | 81(62, 92)              | 98(92, 100)     | 96(78, 99)      | 93 (84, 97)  |
|             |               | Neg        | 5   | 63                      |                         |                 |                 |              |
| 15-24years  | <b>PfHRP2</b> | Pos        | 38  | 12                      | 62(50, 73)              | 88(80, 93)      | 76(63, 86)      | 79(71, 86)   |
|             |               | Neg        | 23  | 88                      |                         |                 |                 |              |
|             | <b>PfLDH</b>  | Pos        | 42  | 1                       | 69(56, 79)              | 99(95, 100)     | 98(88, 99)      | 84(76, 89)   |
|             |               | Neg        | 19  | 99                      |                         |                 |                 |              |
| 25-34 years | <b>PfHRP2</b> | Pos        | 26  | 1                       | 93(77, 98)              | 98(92, 100)     | 96(82, 99)      | 97(90, 99)   |
|             |               | Neg        | 2   | 64                      |                         |                 |                 |              |
|             | <b>PfLDH</b>  | Pos        | 20  | 1                       | 71(53, 85)              | 98(92, 100)     | 95(77, 99)      | 89(80, 94)   |
|             |               | Neg        | 8   | 64                      |                         |                 |                 |              |
| >34 Years   | <b>PfHRP2</b> | Pos        | 15  | 3                       | 71(50, 86)              | 93(80, 97)      | 83(61, 94)      | 86 ( 73, 94) |
|             |               | Neg        | 6   | 37                      |                         |                 |                 |              |
|             | <b>PfLDH</b>  | Pos        | 12  | 0                       | 57(37, 76)              | 100(91, 100)    | 100(75, 100)    | 82(69, 90)   |
|             |               | Neg        | 9   | 40                      |                         |                 |                 |              |
